# Supplementary material
Source: PubMed Central journal article supplement (PMC7239628)
Supplement: mmc1.pdf [file mmc1.pdf]

# THE LANCET Psychiatry

## Supplementary appendix

This appendix formed part of the original submission and has been peer reviewed. We post it as supplied by the authors.

Supplement to: Pereira-Sanchez V, Adiukwu F, El Hayek S, et al. COVID-19 effect on mental health: patients and workforce. *Lancet Psychiatry* 2020; **7**: e29–30.

**Appendix table: Overview of the challenges and opportunities for early career psychiatrists in the represented WHO regions and countries**

| Region                | Country   | Countries' history of disasters and trauma experience                                | Telepsychiatry availability                                                                                                         | Redeployment           | PPE access and training                         |
|-----------------------|-----------|--------------------------------------------------------------------------------------|-------------------------------------------------------------------------------------------------------------------------------------|------------------------|-------------------------------------------------|
| Africa                | Nigeria   | 2014 Ebola virus disease epidemic; terrorism                                         | Not yet available                                                                                                                   | Not yet                | Access to PPE and training in place             |
| Americas              | USA       | Sep 11, 2001 terrorist attacks; veterans of military campaigns                       | Regulations restricting the use of telepsychiatry have been loosened nationwide; wide availability of online conferencing tools     | Incipient              | Access to PPE and training in place             |
|                       | Brazil    | 2015 Zika virus disease epidemic; 2019 Brumadinho dam disaster; internal violence    | Regulations restricting the use of telepsychiatry have been loosened nationwide; used more in the private sector than in the public | Not yet                | Variable training and access to PPE             |
|                       | Colombia  | 2015 Zika virus disease epidemic; Venezuelan refugee crisis; internal violence       | Bureaucratic roadblocks to deployment                                                                                               | Not yet                | Access to PPE and training in place             |
|                       | Paraguay  | 2015 Zika virus disease epidemic; 2019 dengue fever pandemic                         | Incipient and restricted, with telephone hotlines already enabled                                                                   | Not yet                | Variable and limited access to PPE and training |
| Eastern Mediterranean | Egypt     | 2011 Egyptian revolution; terrorism; Syrian refugee crisis                           | Telepsychiatry via online conferencing tools; predominant in the private sector                                                     | Not yet                | Poor training and access to PPE                 |
|                       | Iran      | Earthquakes and floods; financial and international strains; 2020 airplane shot down | Online individual and group psychotherapy (including groups for health care professionals); telephone hotlines                      | Ongoing                | Access to PPE and training in place             |
|                       | Lebanon   | 2006 Lebanon war; Syrian refugee crisis                                              | Restricted access                                                                                                                   | Voluntary              | Access to PPE and training in place             |
|                       | Tunisia   | 2011 Tunisian revolution; Libyan refugee crisis; terrorism                           | Incipient telepsychiatry through online conferencing platforms and telephone consultation                                           | Not yet                | Poor access to PPE and variable training        |
| Europe                | Italy     | 2009 L'Aquila earthquake; 2016 central Italy earthquake                              | More available in the private sector; mainly through telephone hotlines, conferencing tools and social media                        | Variable               | Variable training and access to PPE             |
|                       | Kosovo*   | 1998 Kosovo war                                                                      | Emergent use of telephone hotlines and online psychotherapy                                                                         | Voluntary              | Poor access to PPE and variable training        |
|                       | Portugal  | 2008 financial crisis                                                                | Emergent use of teleconsultation services for health professionals and patients                                                     | Incipient              | Access to PPE in place with variable training   |
|                       | Spain     | Episodes of terrorism (up to 2017); 2008 financial crisis                            | Telephone consultation for health professionals and outpatient services                                                             | Ongoing                | Variable training and access to PPE             |
| South-East Asia       | India     | 2004 earthquake and tsunami; 2008 Mumbai terrorist attacks                           | Informal phone, messaging, and conferencing for individuals and groups                                                              | Likelihood of imminent | Variable training and access to PPE             |
|                       | Indonesia | 2004 and 2018 earthquake and tsunamis                                                | Use of popular online conferencing tools; online psychological first aid                                                            | Not yet                | Access to PPE in place without training         |
| Western Pacific       | Singapore | 2003 SARS epidemic; 2009 H1N1 epidemic                                               | Use of online conferencing tools for educational, research, and clinical work; telephone hotlines widely used                       | Not yet                | Access to PPE and training in place             |

Information on telepsychiatry, redeployment, and PPE at 1 April, 2020. Redeployment=transfer of psychiatrists to other medical duties in the care for patients with COVID-19. PPE=personal protective equipment. \*Kosovo is not recognised as a member state by WHO.
